# Supplementary material for: 2016 Chinese guidelines for the management of dyslipidemia in adults
Source: PubMed Central journal article supplement — J Geriatr Cardiol. 2018 Jan;15(1):1–29. doi: 10.11909/j.issn.1671-5411.2018.01.011 (PMC5803534; doi:10.11909/j.issn.1671-5411.2018.01.011), 2018-01
Supplement: jgc-15-01-001-s003.pdf [file jgc-15-01-001-s003.pdf]

**Supplement 3. Writing group members (Listed in alphabetic order by last name in Chinese Pinyin).**

Hong CHEN, *Peking University People's Hospital, Beijing, China*  
Wei-Wei CHEN, *National Center for Cardiovascular Diseases, Beijing, China*  
Wen-Xiang Chen, *Beijing Hospital, Beijing, China*  
Yu-Gang DONG, *the First Affiliated Hospital of Sun Yat-sen University, Guangzhou, China*  
Wei GAO, *Peking University Third Hospital, Beijing, China*  
Yan GAO, *Peking University First Hospital, Beijing, China*  
Run-Lin GAO, *Fuwai Hospital, Chinese Academy of Medical Sciences, Beijing, China*  
Jun-Bo GE, *Zhongshan Hospital, Fudan University, Shanghai, China*  
Ya-Ling HAN, *the General Hospital of Shenyang Military Region, Shenyang, China*  
Da-Yi HU, *Peking University People's Hospital, Beijing, China*  
Yong HUO, *Peking University First Hospital, Beijing, China*  
Li-Nong JI, *Peking University People's Hospital, Beijing, China*  
Guo-Liang JIA, *Dongguan Kanghua Hospital, Dongguan, China*  
Wei-Ping JIA, *Shanghai Sixth People's Hospital, Shanghai, China*  
Ying LI, *National Center for Cardiovascular Diseases, Beijing, China*  
Yong LI, *Huashan Hospital, Fudan University, Shanghai, China*  
Guang-Wei LI, *Fuwai Hospital, Chinese Academy of Medical Sciences, Beijing, China*  
Jian-Jun LI, *Fuwai Hospital, Chinese Academy of Medical Sciences, Beijing, China*  
Xiang-Ping Li, *the Second Xiangya Hospital of Central South University, Changsha, China*  
Xiao-Ying LI, *Chinese PLA General Hospital, Beijing, China*  
Yu-Hua LIAO, *Union Hospital, Tongji Medical College, Huazhong University of Science and Technology, Wuhan, China*  
Jing LIU, *Beijing Anzhen Hospital, Capital Medical University, Beijing, China*  
Mei-Lin LIU, *Peking University First Hospital, Beijing, China*  
Guo-Ping LU, *Ruijin Hospital, Shanghai Jiao Tong University School of Medicine, Shanghai, China*  
Ju-Ming LU, *Chinese PLA General Hospital, Beijing, China*  
Zong-Liang LU, *Fuwai Hospital, Chinese Academy of Medical Sciences, Beijing, China*  
Hong MA, *the First Affiliated Hospital of Sun Yat-sen University, Guangzhou, China*  
Guan-Sheng MA, *School of Public Health, Peking University Health Science Center, Beijing, China*  
Guang NING, *Ruijin Hospital, Shanghai Jiao Tong University School of Medicine, Shanghai, China*  
Tian-Hai NING, *Chinese Society of Cardiology, Chinese medical Association, Beijing, China*  
Bo-Shen PAN, *Zhongshan Hospital, Fudan University, Shanghai, China*  
Chang-Yu PAN, *Chinese PLA General Hospital, Beijing, China*  
Dao-Quan PENG, *the Second Xiangya Hospital of Central South University, Changsha, China*  
Wei-Feng SHEN, *Ruijin Hospital, Shanghai Jiao Tong University School of Medicine, Beijing, China*  
Yong-Jun WANG, *Beijing Tian Tan Hospital, Capital Medical University, Beijing, China*  
Zeng-Wu WANG, *National Center for Cardiovascular Diseases, Beijing, China*  
Xue-Si WU, *Beijing Anzhen Hospital, Capital Medical University, Beijing, China*  
Yang-Feng WU, *School of Public Health, Peking University Health Science Center, Beijing, China*  
Cheng-Bin XU, *Peking University People's Hospital, Beijing, China*  
Sheng-Kai YAN, *China-Japan Friendship Hospital, Beijing, China*  
Xiao-Wei YAN, *Peking Union Medical College Hospital, Beijing, China*  
Xiao-Guang YANG, *National Institute for Nutrition and Health, Chinese Center for Disease Prevention and Control, Beijing, China*  
Ping YE, *Chinese PLA General Hospital, Beijing, China*  
Kai YOU, *Peking Union Medical College Hospital, Beijing, China*  
Ding-Yin ZENG, *the First Hospital of China Medical University, Shenyang, China*  
Zheng-Pei ZENG, *Peking Union Medical College Hospital, Beijing, China*  
Si-Yan ZHAN, *School of Public Health, Peking University Health Science Center, Beijing, China*  
Yuan ZHANG, *Qilu Hospital, Shandong University, Jinan, China*  
Dong ZHAO, *Beijing Anzhen Hospital, Capital Medical University, Beijing, China*  
Shui-Ping ZHAO, *the Second Xiangya Hospital of Central South University, Changsha, China*  
Jun-Ren ZHU, *Zhongshan Hospital, Fudan University, Shanghai, China*  
Da-Jin ZOU, *Changhai Hospital of Shanghai, Shanghai, China*
