# Supplementary figures and images for: 2016 Chinese guidelines for the management of dyslipidemia in adults
Source: PubMed Central journal article supplement — J Geriatr Cardiol. 2018 Jan;15(1):1–29. doi: 10.11909/j.issn.1671-5411.2018.01.011 (PMC5803534; doi:10.11909/j.issn.1671-5411.2018.01.011), 2018-01

## Supplement 2. Risk stratification of atherosclerotic cardiovascular disease.

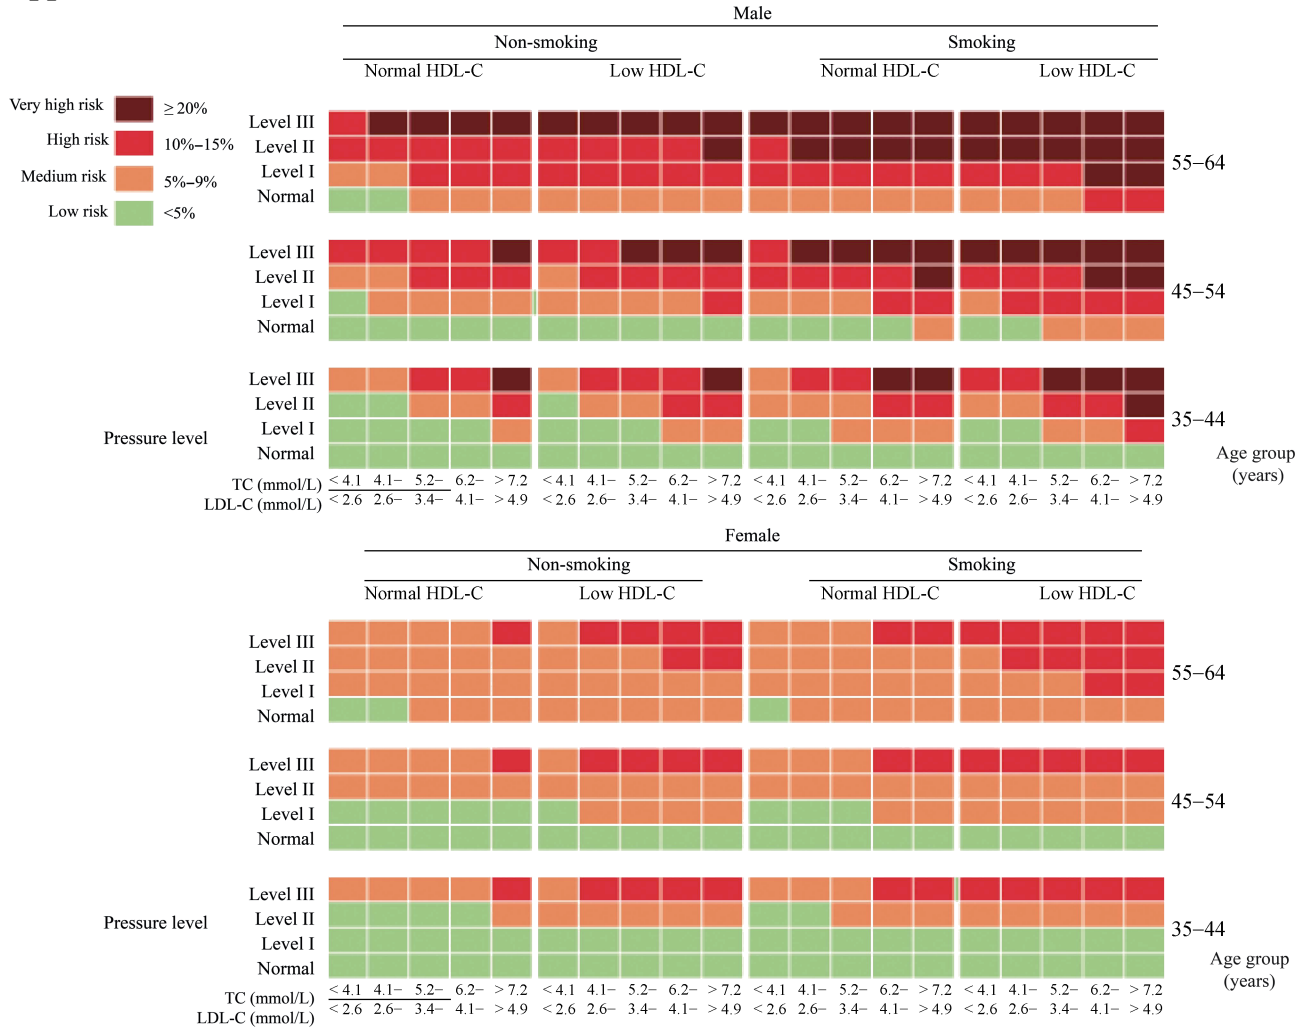

Supplement: jgc-15-01-001-s002.pdf [file jgc-15-01-001-s002.pdf]
